# Supplementary material for: A Predictive Model for Medical Events Based on Contextual Embedding of Temporal Sequences
Source: PubMed Central journal article supplement (PMC5148810; doi:10.2196/medinform.5977), 2016-11-25
Supplement: medinform_v4i4e39_app1.pdf [file medinform_v4i4e39_app1.pdf]

| ICD    | Diagnosis                                                                                                              | LR     | Collaborative | PDES   | PDPS   |
|--------|------------------------------------------------------------------------------------------------------------------------|--------|---------------|--------|--------|
| 008.45 | Intestinal infection due to Clostridium difficile                                                                      | 0.5496 | 0.6098        | 0.6230 | 0.6264 |
| 038.9  | Unspecified septicemia                                                                                                 | 0.5926 | 0.6406        | 0.6478 | 0.6515 |
| 070.54 | Chronic hepatitis C without mention of hepatic coma                                                                    | 0.8083 | 0.7837        | 0.7160 | 0.8530 |
| 244.9  | Unspecified acquired hypothyroidism                                                                                    | 0.5167 | 0.5511        | 0.5426 | 0.5360 |
| 250.00 | Diabetes mellitus without mention of complication, type II or unspecified type, not stated as uncontrolled             | 0.6629 | 0.6733        | 0.6490 | 0.6099 |
| 250.40 | Diabetes with renal manifestations, type II or unspecified type, not stated as uncontrolled                            | 0.7674 | 0.8213        | 0.7801 | 0.7989 |
| 250.60 | Diabetes with neurological manifestations, type II or unspecified type, not stated as uncontrolled                     | 0.7290 | 0.7945        | 0.7870 | 0.7951 |
| 263.9  | Unspecified protein-calorie malnutrition                                                                               | 0.5696 | 0.6341        | 0.6104 | 0.6548 |
| 272.0  | Pure hypercholesterolemia                                                                                              | 0.5914 | 0.6726        | 0.5811 | 0.6679 |
| 272.4  | Other and unspecified hyperlipidemia                                                                                   | 0.6992 | 0.7330        | 0.7017 | 0.7233 |
| 274.9  | Gout, unspecified                                                                                                      | 0.6506 | 0.6937        | 0.6644 | 0.7028 |
| 276.0  | Hyperosmolality and/or hypernatremia                                                                                   | 0.5548 | 0.6521        | 0.6403 | 0.6321 |
| 276.1  | Hyposmolality and/or hyponatremia                                                                                      | 0.5835 | 0.6052        | 0.5985 | 0.5831 |
| 276.2  | Acidosis                                                                                                               | 0.5314 | 0.6112        | 0.5921 | 0.5706 |
| 276.5  | Volume depletion disorder                                                                                              | 0.7679 | 0.7510        | 0.6397 | 0.7286 |
| 276.51 | Dehydration                                                                                                            | 0.5220 | 0.6071        | 0.6071 | 0.6121 |
| 276.52 | Hypovolemia                                                                                                            | 0.5610 | 0.5898        | 0.6464 | 0.6117 |
| 276.7  | Hyperpotassemia                                                                                                        | 0.6037 | 0.6646        | 0.6645 | 0.6469 |
| 276.8  | Hypopotassemia                                                                                                         | 0.5368 | 0.5989        | 0.5930 | 0.5889 |
| 278.00 | Obesity, unspecified                                                                                                   | 0.6322 | 0.6466        | 0.6075 | 0.6763 |
| 280.9  | Iron deficiency anemia, unspecified                                                                                    | 0.5936 | 0.5849        | 0.6430 | 0.6502 |
| 285.1  | Acute posthemorrhagic anemia                                                                                           | 0.5498 | 0.5809        | 0.5794 | 0.6176 |
| 285.21 | Anemia in chronic kidney disease                                                                                       | 0.7542 | 0.8351        | 0.7897 | 0.8087 |
| 285.29 | Anemia of other chronic disease                                                                                        | 0.4657 | 0.6020        | 0.6177 | 0.5890 |
| 285.9  | Anemia, unspecified                                                                                                    | 0.5602 | 0.5307        | 0.5603 | 0.5538 |
| 287.5  | Thrombocytopenia, unspecified                                                                                          | 0.5899 | 0.6201        | 0.6124 | 0.6306 |
| 293.0  | Delirium due to conditions classified elsewhere                                                                        | 0.5294 | 0.6570        | 0.6532 | 0.6454 |
| 300.00 | Anxiety state, unspecified                                                                                             | 0.5928 | 0.6682        | 0.6180 | 0.6318 |
| 305.1  | Tobacco use disorder                                                                                                   | 0.6916 | 0.6614        | 0.6158 | 0.6972 |
| 311    | Depressive disorder, not elsewhere classified                                                                          | 0.5535 | 0.6048        | 0.6120 | 0.6267 |
| 327.23 | Obstructive sleep apnea (adult)(pediatric)                                                                             | 0.7468 | 0.7254        | 0.6830 | 0.7481 |
| 357.2  | Polyneuropathy in diabetes                                                                                             | 0.7000 | 0.8151        | 0.7857 | 0.8439 |
| 401.9  | Unspecified essential hypertension                                                                                     | 0.6664 | 0.6500        | 0.5712 | 0.5960 |
| 403.90 | Hypertensive chronic kidney disease, unspecified, with chronic kidney disease stage I through stage IV, or unspecified | 0.7586 | 0.7355        | 0.7660 | 0.7324 |
| 403.91 | Hypertensive chronic kidney disease, unspecified, with chronic kidney disease stage V or end stage renal disease       | 0.7252 | 0.7905        | 0.7657 | 0.8068 |
| 410.71 | Subendocardial infarction, initial episode of care                                                                     | 0.6521 | 0.6632        | 0.6360 | 0.6756 |
| 412    | Old myocardial infarction                                                                                              | 0.7021 | 0.7207        | 0.6497 | 0.7080 |
| 414.00 | Coronary atherosclerosis of unspecified type of vessel, native or graft                                                | 0.8427 | 0.8086        | 0.8103 | 0.7859 |
| 414.01 | Coronary atherosclerosis of native coronary artery                                                                     | 0.6674 | 0.7394        | 0.7180 | 0.7582 |
| 416.8  | Other chronic pulmonary heart diseases                                                                                 | 0.6518 | 0.7186        | 0.7114 | 0.7265 |
| 424.0  | Mitral valve disorders                                                                                                 | 0.5332 | 0.6812        | 0.6344 | 0.6655 |
| 424.1  | Aortic valve disorders                                                                                                 | 0.6559 | 0.6905        | 0.6332 | 0.6999 |
| 425.4  | Other primary cardiomyopathies                                                                                         | 0.6772 | 0.6951        | 0.6118 | 0.6922 |
| 427.1  | Paroxysmal ventricular tachycardia                                                                                     | 0.5593 | 0.6078        | 0.6272 | 0.6459 |

|         |                                                                                                           |        |        |        |        |
|---------|-----------------------------------------------------------------------------------------------------------|--------|--------|--------|--------|
| 427.31  | Atrial fibrillation                                                                                       | 0.6286 | 0.6976 | 0.6674 | 0.6946 |
| 427.89  | Other specified cardiac dysrhythmias                                                                      | 0.5266 | 0.5613 | 0.5654 | 0.5594 |
| 428.0   | Congestive heart failure, unspecified                                                                     | 0.6646 | 0.7179 | 0.6848 | 0.7066 |
| 428.22  | Chronic systolic heart failure                                                                            | 0.7801 | 0.7839 | 0.7929 | 0.7954 |
| 428.23  | Acute on chronic systolic heart failure                                                                   | 0.7763 | 0.7845 | 0.8008 | 0.7989 |
| 428.32  | Chronic diastolic heart failure                                                                           | 0.7178 | 0.7746 | 0.7159 | 0.7769 |
| 428.33  | Acute on chronic diastolic heart failure                                                                  | 0.7469 | 0.7813 | 0.7703 | 0.7954 |
| 443.9   | Peripheral vascular disease, unspecified                                                                  | 0.6569 | 0.7132 | 0.6913 | 0.7265 |
| 458.29  | Other iatrogenic hypotension                                                                              | 0.5812 | 0.5815 | 0.6068 | 0.6260 |
| 458.9   | Hypotension, unspecified                                                                                  | 0.5155 | 0.5112 | 0.5865 | 0.5688 |
| 486     | Pneumonia, organism unspecified                                                                           | 0.5949 | 0.6036 | 0.5912 | 0.6069 |
| 491.21  | Obstructive chronic bronchitis with (acute) exacerbation                                                  | 0.7516 | 0.7610 | 0.7172 | 0.7696 |
| 493.90  | Asthma, unspecified type, unspecified                                                                     | 0.6958 | 0.6102 | 0.5686 | 0.6018 |
| 496     | Chronic airway obstruction, not elsewhere classified                                                      | 0.6621 | 0.6560 | 0.6130 | 0.6462 |
| 507.0   | Pneumonitis due to inhalation of food or vomitus                                                          | 0.5925 | 0.6144 | 0.5990 | 0.6162 |
| 511.9   | Unspecified pleural effusion                                                                              | 0.5607 | 0.5938 | 0.5534 | 0.5818 |
| 518.0   | Pulmonary collapse                                                                                        | 0.5263 | 0.5404 | 0.5684 | 0.5465 |
| 518.5   | Pulmon insuff fl tra n surg                                                                               | 0.5544 | 0.5812 | 0.5122 | 0.5895 |
| 518.81  | Acute respiratory failure                                                                                 | 0.5955 | 0.6276 | 0.5857 | 0.5918 |
| 530.81  | Esophageal reflux                                                                                         | 0.5689 | 0.5534 | 0.5535 | 0.5588 |
| 571.2   | Alcoholic cirrhosis of liver                                                                              | 0.7212 | 0.7590 | 0.6885 | 0.8020 |
| 571.5   | Cirrhosis of liver without mention of alcohol                                                             | 0.7004 | 0.7167 | 0.7197 | 0.7624 |
| 578.9   | Hemorrhage of gastrointestinal tract, unspecified                                                         | 0.6031 | 0.6018 | 0.5759 | 0.6406 |
| 584.5   | Acute kidney failure with lesion of tubular necrosis                                                      | 0.6060 | 0.6340 | 0.5891 | 0.5945 |
| 584.9   | Acute kidney failure, unspecified                                                                         | 0.6011 | 0.6489 | 0.6340 | 0.6317 |
| 585.6   | End stage renal disease                                                                                   | 0.7728 | 0.8209 | 0.7932 | 0.8125 |
| 585.9   | Chronic kidney disease, unspecified                                                                       | 0.7504 | 0.6987 | 0.7306 | 0.6872 |
| 599.0   | Urinary tract infection, site not specified                                                               | 0.6031 | 0.6118 | 0.6142 | 0.5985 |
| 600.00  | Hypertrophy (benign) of prostate without urinary obstruction and other lower urinary tract symptom (LUTS) | 0.7400 | 0.7021 | 0.7021 | 0.7276 |
| 707.03  | Pressure ulcer, lower back                                                                                | 0.6176 | 0.6465 | 0.6646 | 0.6350 |
| 733.00  | Osteoporosis, unspecified                                                                                 | 0.5918 | 0.6142 | 0.5954 | 0.6635 |
| 995.91  | Sepsis                                                                                                    | 0.5804 | 0.6758 | 0.6604 | 0.6339 |
| 995.92  | Severe sepsis                                                                                             | 0.6323 | 0.6570 | 0.6385 | 0.6146 |
| 997.1   | Cardiac complications, not elsewhere classified                                                           | 0.6255 | 0.7123 | 0.6041 | 0.7188 |
| 998.11  | Hemorrhage complicating a procedure                                                                       | 0.6072 | 0.5940 | 0.5966 | 0.6336 |
| 998.59  | Other postoperative infection                                                                             | 0.6530 | 0.6786 | 0.5526 | 0.6218 |
| Average |                                                                                                           | 0.6369 | 0.6693 | 0.6488 | 0.6718 |
